# Supplementary material
Source: publisher figshare collection journal article supplement (https://asha.figshare.com/articles/dataset/_/22357327)
Supplement: Supplementary file 1 [file 1]

## Supplemental Material S2. Selected questions from TOPS SLP survey.

### Highest level of training

|   |          |
|---|----------|
| 1 | Master's |
| 2 | Ph.D.    |

### Years practicing

|   |            |
|---|------------|
| 1 | < 5 years  |
| 2 | 5-10 years |
| 3 | > 10 years |

### Years working with pediatric brain injuries

|   |          |
|---|----------|
| 1 | 0        |
| 2 | < 1 year |
| 3 | > 1 year |

### Rate your level of comfort working with pediatric brain injuries

|   |                        |
|---|------------------------|
| 1 | Not at all comfortable |
| 2 | A little comfortable   |
| 3 | Somewhat comfortable   |
| 4 | Very comfortable       |
| 5 | Extremely comfortable  |

### How comfortable do you feel involving families in the TOPS program?

|   |                        |
|---|------------------------|
| 1 | Not at all comfortable |
| 2 | A little comfortable   |
| 3 | Somewhat comfortable   |
| 4 | Very comfortable       |
| 5 | Extremely comfortable  |

### How often do you involve families in your treatment with adolescents with brain injuries?

|   |           |
|---|-----------|
| 1 | Never     |
| 2 | Rarely    |
| 3 | Sometimes |
| 4 | Often     |

|   |        |
|---|--------|
| 5 | Always |
|---|--------|

How many TOPS patients have you worked with to date?

|   |     |
|---|-----|
| 1 | 1   |
| 2 | > 1 |

Tell us about the patients with whom you used TOPS: what are their diagnoses?

Tell us about the patients with whom you used TOPS: did you have sessions in-person, via telehealth, or both?

|   |                |
|---|----------------|
| 1 | In-person      |
| 2 | Via telehealth |
| 3 | Both           |

Rate your level of comfort using TOPS with your patients

|   |                        |
|---|------------------------|
| 1 | Not at all comfortable |
| 2 | A little comfortable   |
| 3 | Somewhat comfortable   |
| 4 | Very comfortable       |
| 5 | Extremely comfortable  |

If you rated yourself as a little/not at all comfortable, please indicate what would help you feel more comfortable.

What additional training would be helpful for you to effectively deliver TOPS to your patients?

|   |                                                        |
|---|--------------------------------------------------------|
| 1 | More information about brain injuries                  |
| 2 | More information about emotion regulation              |
| 3 | More information about behavior management             |
| 4 | More information about anger management                |
| 5 | More information about dealing with psychiatric crises |
| 6 | Other                                                  |

If other, what?

What training would you recommend be provided to other SLPs before beginning TOPS?

|   |                                           |
|---|-------------------------------------------|
| 1 | More information about brain injuries     |
| 2 | More information about emotion regulation |

|   |                                                        |
|---|--------------------------------------------------------|
| 3 | More information about behavior management             |
| 4 | More information about anger management                |
| 5 | More information about dealing with psychiatric crises |
| 6 | Other                                                  |

If other, what?

What are the benefits you see about SLPs providing intervention services for adolescents with TBI using TOPS?

What are the challenges you see with SLPs providing intervention services for adolescents with TBI using TOPS?

I will use TOPS again.

|   |                   |
|---|-------------------|
| 1 | Strongly disagree |
| 2 | Disagree          |
| 3 | Neutral           |
| 4 | Agree             |
| 5 | Strongly agree    |

After using the program, I feel more comfortable with the program scope and content.

|   |                   |
|---|-------------------|
| 1 | Strongly disagree |
| 2 | Disagree          |
| 3 | Neutral           |
| 4 | Agree             |
| 5 | Strongly agree    |
